# Supplementary material for: Decursinol Angelate Arrest Melanoma Cell Proliferation by Initiating Cell Death and Tumor Shrinkage via Induction of Apoptosis
Source: MDPI journal article supplement (doi:10.3390/ijms22084096), 2021-04-15
Supplement: s1 [file s1]

**Supplementary Table 1.** List of antibodies used in the study.

| S.No | Protein name                                          | Company name               | Molecular weight | Dilution | Host   | Secondary antibody   |
|------|-------------------------------------------------------|----------------------------|------------------|----------|--------|----------------------|
| 1.   | p-JNK 1/2/3 (BS9939M)                                 | Bioworld                   | 46,54            | 1:1000   | Rabbit | Goat anti rabbit-HRP |
| 2.   | Cyclin D1 (sc-753)                                    | Santa Cruz                 | 37               | 1:1000   | Rabbit | Goat anti rabbit-HRP |
| 3.   | CDK2 (sc-163)                                         | Santa Cruz                 | 34               | 1:1000   | Rabbit | Goat anti rabbit-HRP |
| 4.   | CDK4 (sc-260)                                         | Santa Cruz                 | 34               | 1:1000   | Rabbit | Goat anti rabbit-HRP |
| 5.   | CDK5 (2506S)                                          | Cell Signaling             | 30               | 1:1000   | Rabbit | Goat anti rabbit-HRP |
| 6.   | Cyclin E (sc-481)                                     | Santa Cruz                 | 53               | 1:1000   | Rabbit | Goat anti rabbit-HRP |
| 7.   | p21 (sc-397)                                          | Santa Cruz                 | 21               | 1:1000   | Rabbit | Goat anti rabbit-HRP |
| 8.   | mTOR (sc-8319)                                        | Santa Cruz                 | 289,211-245      | 1:1000   | Rabbit | Goat anti rabbit-HRP |
| 9.   | p-mTOR (sc-101738)                                    | Santa Cruz                 | 220              | 1:1000   | Rabbit | Goat anti rabbit-HRP |
| 10.  | ATG-5 (12994S)                                        | Cell Signaling             | 55               | 1:1000   | Rabbit | Goat anti rabbit-HRP |
| 11.  | ATG-7 (8558S)                                         | Cell Signaling             | 78               | 1:1000   | Rabbit | Goat anti rabbit-HRP |
| 12.  | Beclin-1 (3495S)                                      | Cell Signaling             | 60               | 1:1000   | Rabbit | Goat anti rabbit-HRP |
| 13.  | LC-3A/B (L7543)                                       | Santa Cruz                 | 14-16            | 1:1000   | Rabbit | Goat anti rabbit-HRP |
| 14.  | JNK (BS1544)                                          | Bioworld                   | 46,54            | 1:1000   | Rabbit | Goat anti rabbit-HRP |
| 15.  | Bax (2772S)                                           | Cell Signaling             | 20               | 1:1000   | Rabbit | Goat anti rabbit-HRP |
| 16.  | Bcl-2 (5114S)                                         | Cell Signaling             | 28               | 1:1000   | Rabbit | Goat anti rabbit-HRP |
| 17.  | Cytochrome C (11940)                                  | Cell Signaling             | 14               | 1:1000   | Rabbit | Goat anti rabbit-HRP |
| 18.  | CL Caspase 3 (BS4301)                                 | Bioworld                   | 22               | 1:1000   | Rabbit | Goat anti rabbit-HRP |
| 19.  | Caspase 9 (AB0816)                                    | Bioworld                   | 35,37,48         | 1:1000   | Rabbit | Goat anti rabbit-HRP |
| 20.  | PARP-1 (sc-7150)                                      | Santa Cruz                 | 90               | 1:1000   | Mouse  | Goat anti mouse-HRP  |
| 21.  | $\beta$ -actin (#4967)                                | Cell signaling             | 45               | 1:1000   | Rabbit | Goat anti rabbit-HRP |
| 22.  | Secondary goat anti rabbit-HRP (NBP2-30348H) antibody | Novus Biologicals (Bethyl) | -                | 1:5000   | Goat   | -                    |
| 23.  | Secondary donkey anti goat-HRP (NBP2-68552) antibody  | Novus Biologicals (Bethyl) | -                | 1:5000   | Donkey | -                    |
| 24.  | Secondary goat anti mouse-HRP antibody                | Santa Cruz                 | -                | 1:2000   | Goat   | -                    |

|    |                                                           |                                  |   |        |       |   |
|----|-----------------------------------------------------------|----------------------------------|---|--------|-------|---|
| 25 | Secondary sheep anti-rat-<br>HRP (NBP2-22109)<br>antibody | Novus<br>Biologicals<br>(Bethyl) | - | 1:5000 | Sheep | - |
|----|-----------------------------------------------------------|----------------------------------|---|--------|-------|---|

.....

**Supplementary Figures.** Original uncropped images of western blots used for the experiment.

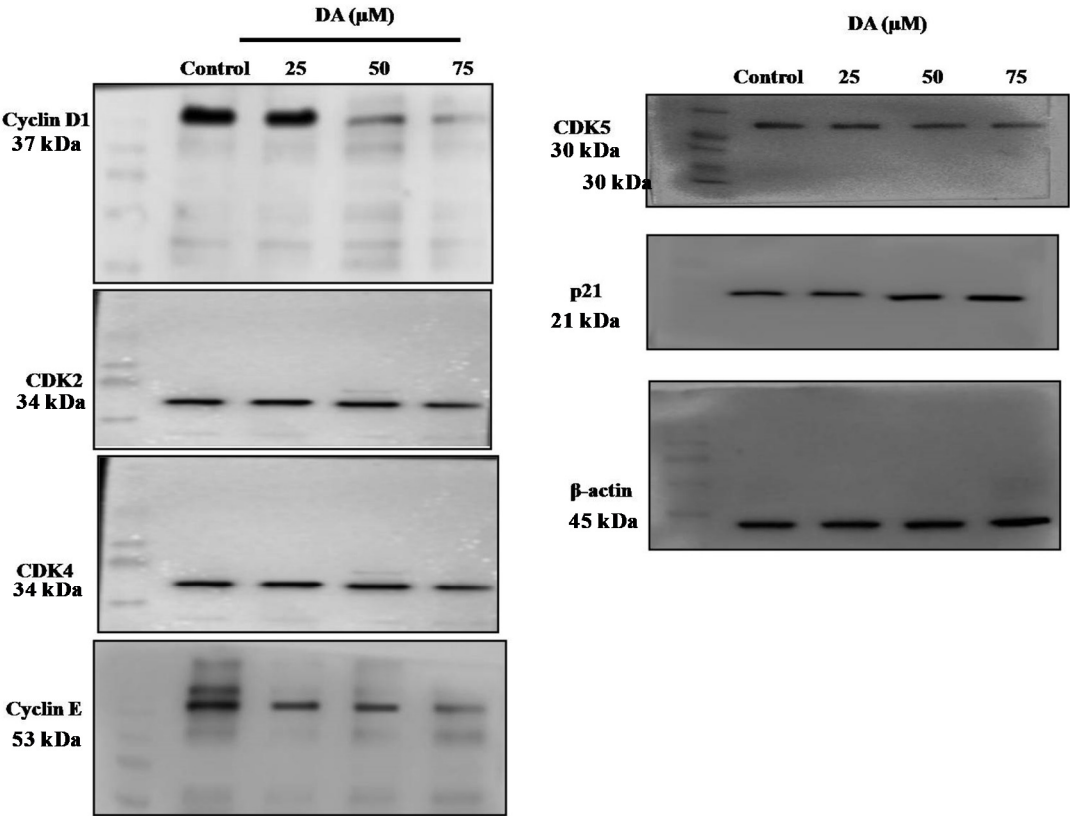

**Fig 2.**

.....

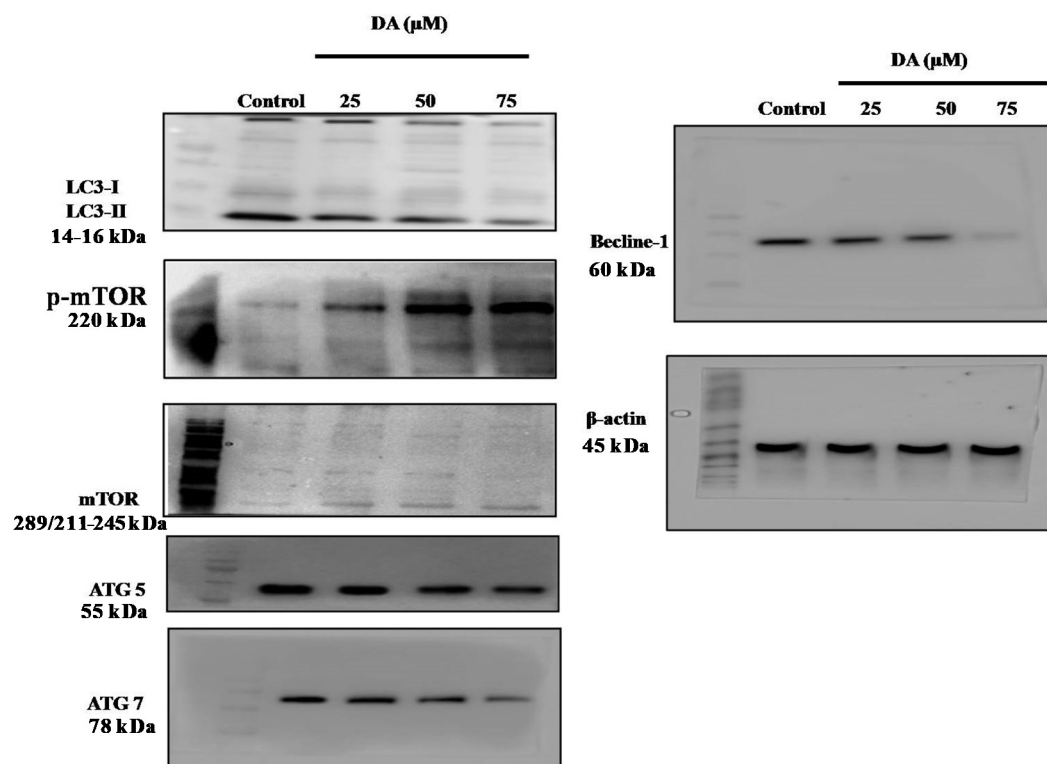

Fig 3.

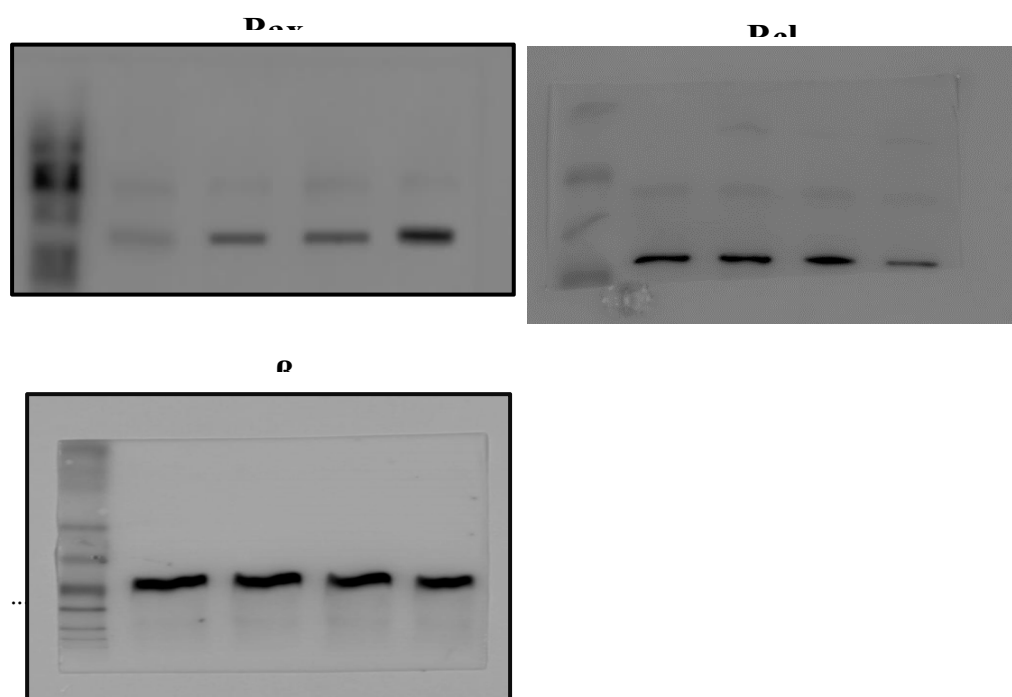

Fig. 4

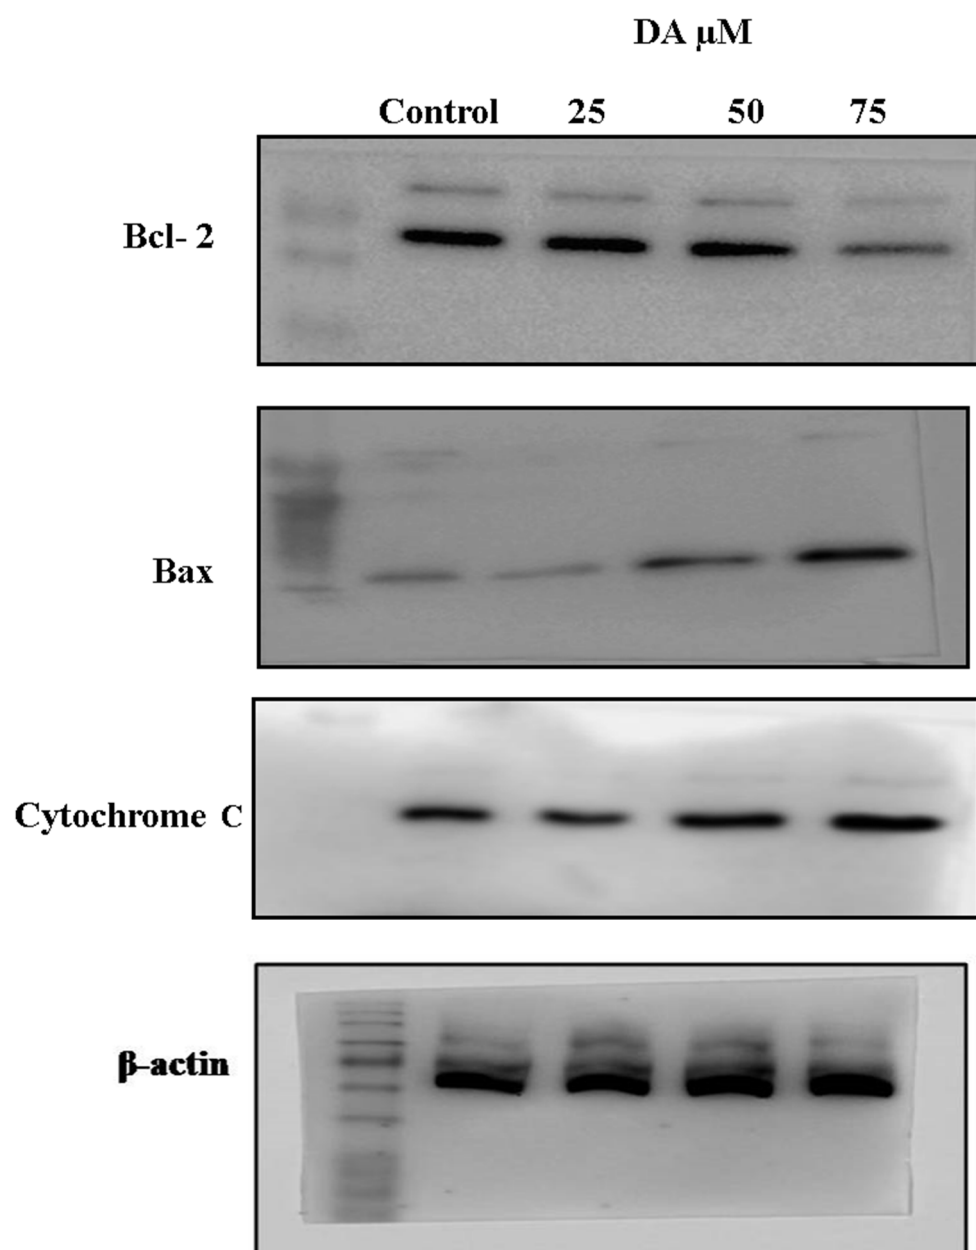

**Fig. 6**

.....

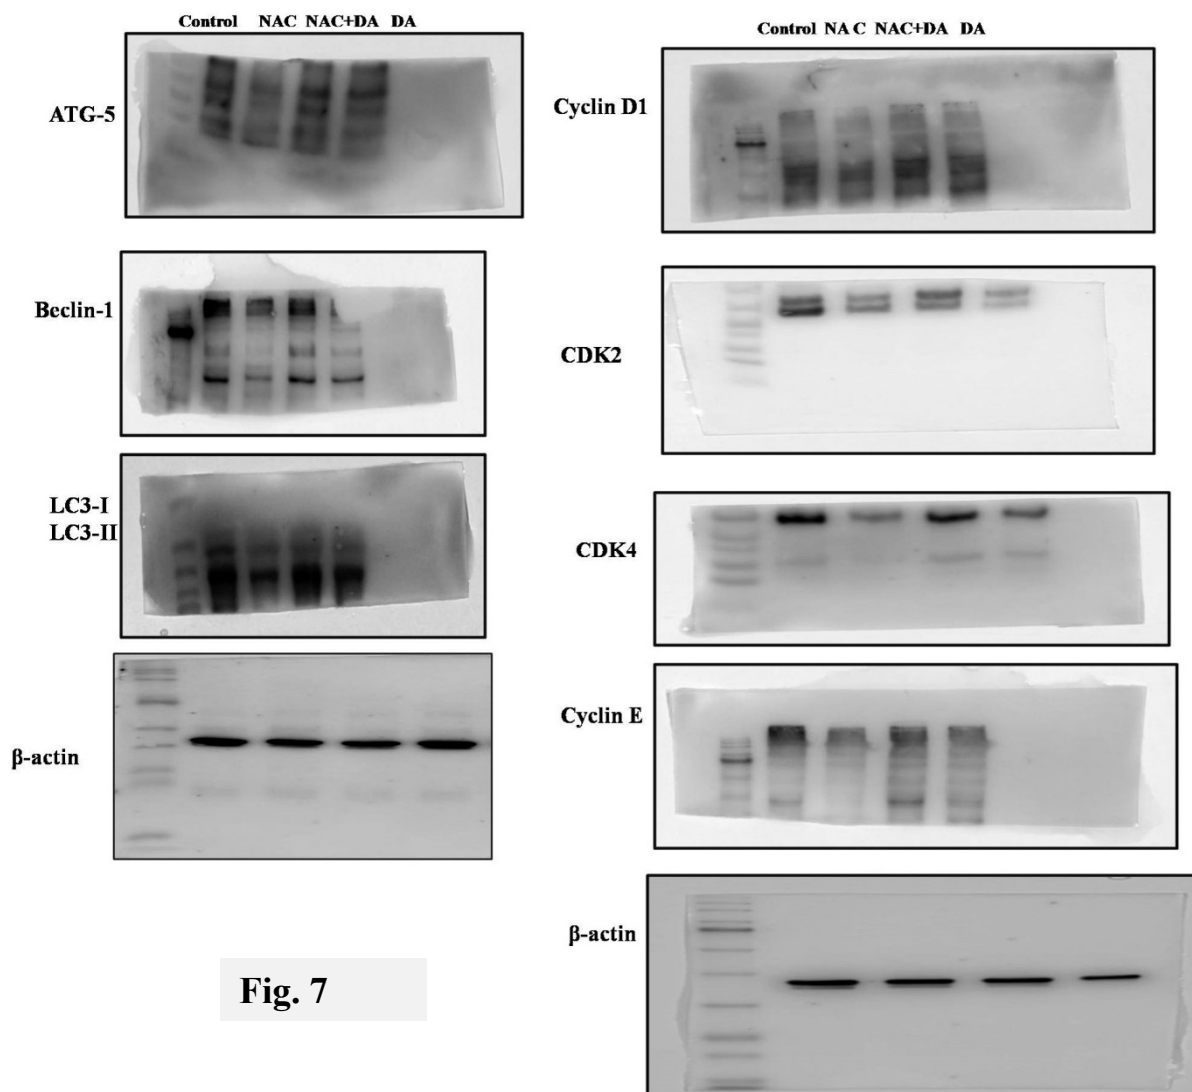

**Fig. 7**

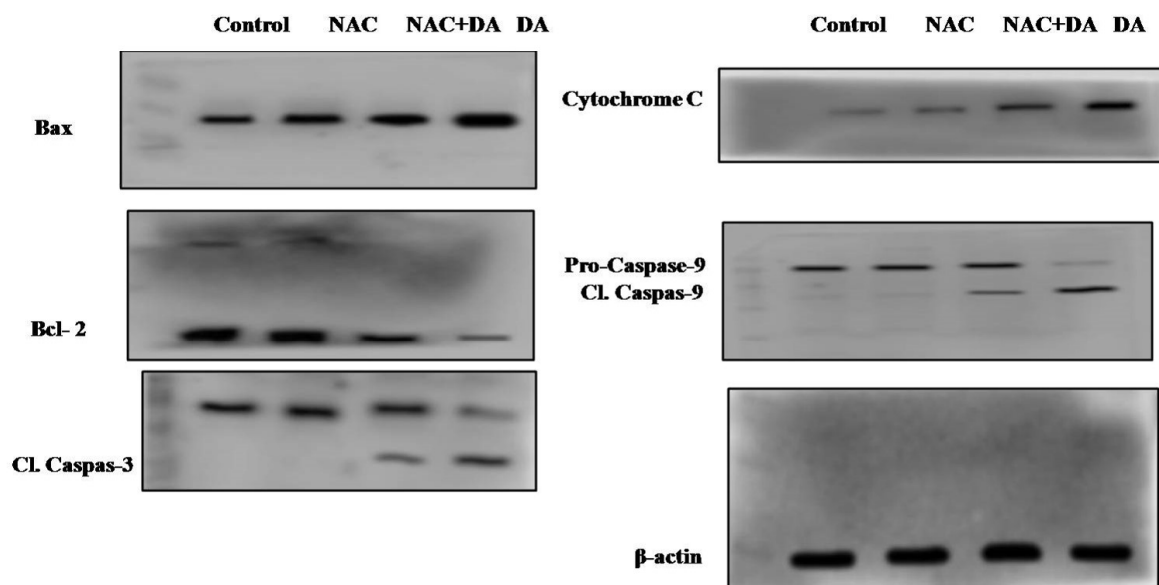

Fig. 8

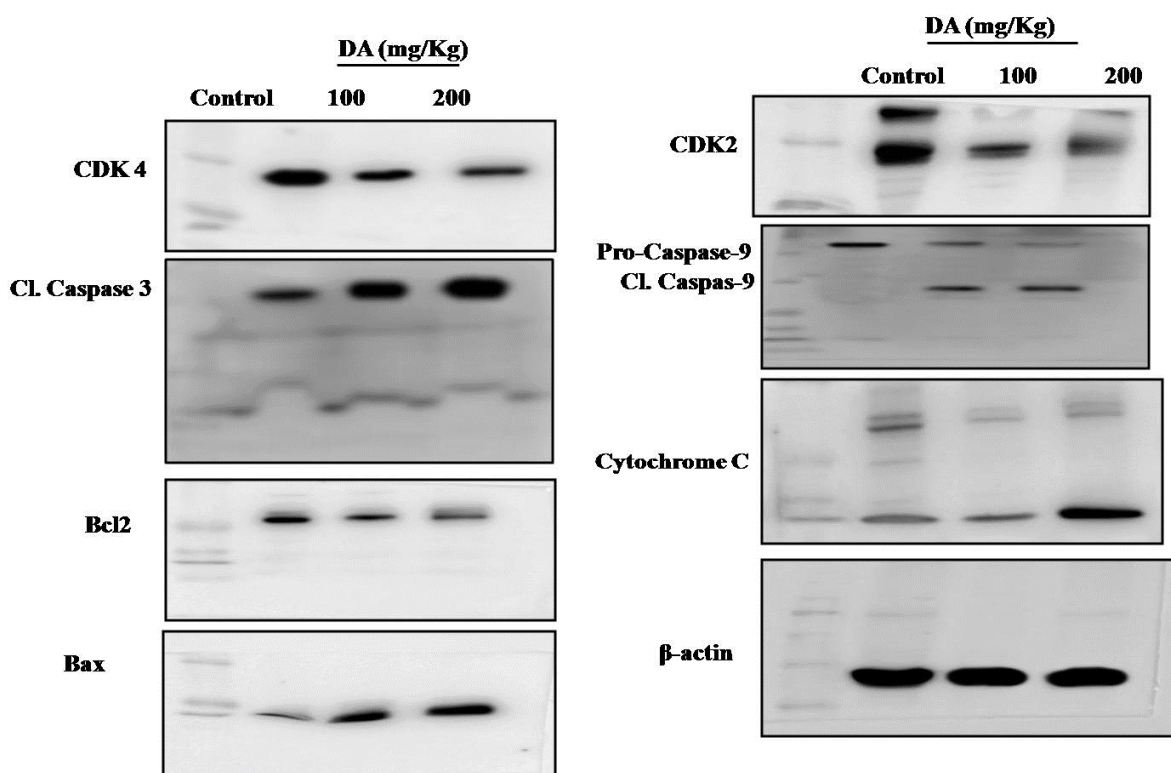

Fig. 10
